# Supplementary material
Source: Springer Nature journal article supplement (https://www.springerprofessional.de/resource/supplementary/13638_2014_945_MOESM12_ESM.pdf/11898816)

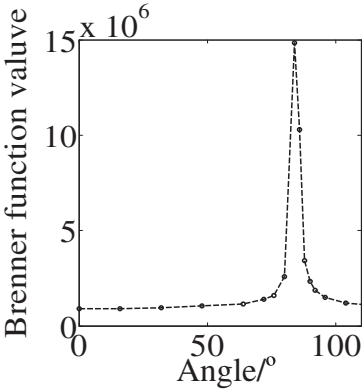

(a)

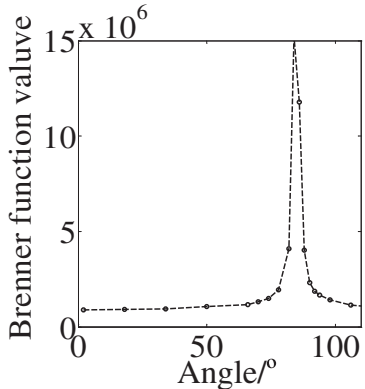

(b)

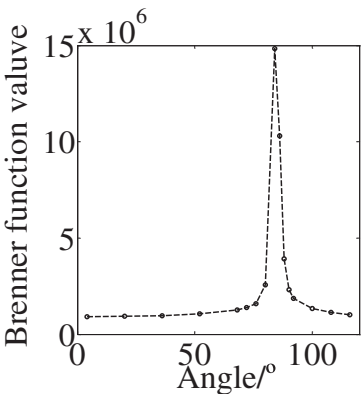

(c)

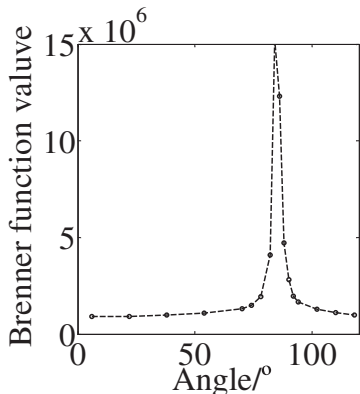

(d)

Supplement: MOESM12 [file 11898816]
